# Supplementary material
Source: PubMed Central journal article supplement (PMC9455622)
Supplement: NIHMS1826530-supplement-SM_Tarakanova_el_al.pdf [file NIHMS1826530-supplement-SM_Tarakanova_el_al.pdf]

## Supporting Information for Publication

### **Modeling and Experiment Reveal Structure and Nanomechanics across the Inverse Temperature Transition in *B. mori* Silk-Elastin-like Protein Polymers**

*Anna Tarakanova, Wenwen Huang, Zhao Qin, David L. Kaplan, Markus J. Buehler*

*Pages: 6*

*Figures: 5*

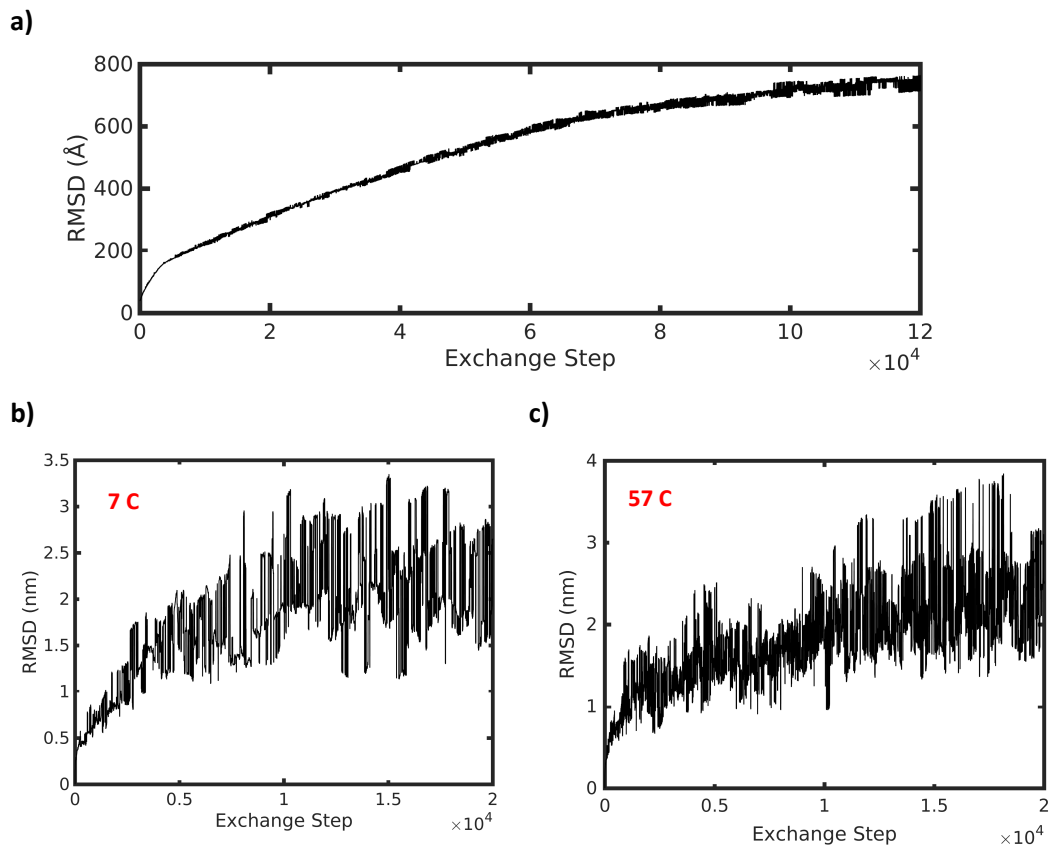

**SI Figure 1** | a) Root mean square deviation (RMSD) for implicit solvent Replica Exchange simulation. Replica at 27°C. b) RMSD for explicit solvent Replica Exchange simulation. Replica at 7°C. c) RMSD for explicit solvent Replica Exchange simulation. Replica at 57°C.

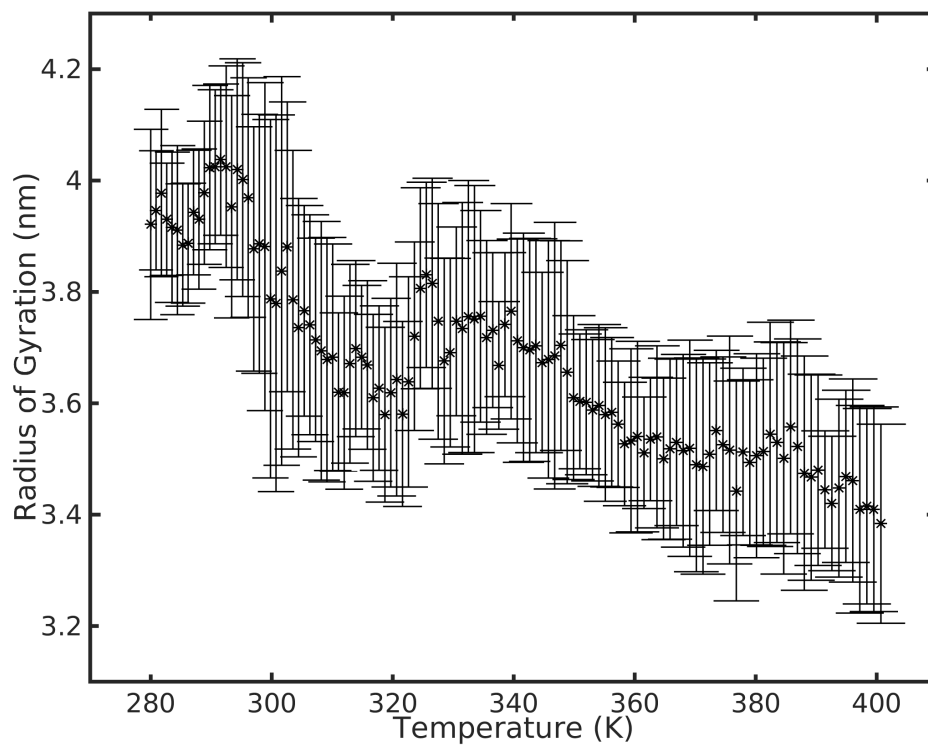

**SI Figure 2** | Radius of gyration change with temperature shows a gradual structural transition.

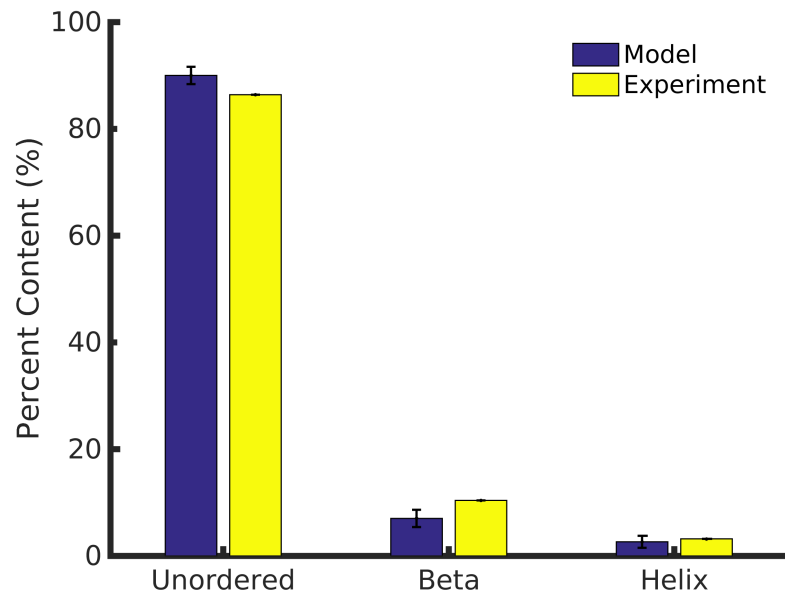

**SI Figure 3** | Secondary structure comparison between simulation (derived via the DSSP algorithm) and experiment (CD Spectra) at 7°C. Ordered structure includes beta structure and helices. Unordered structure includes bends, turns and coils.

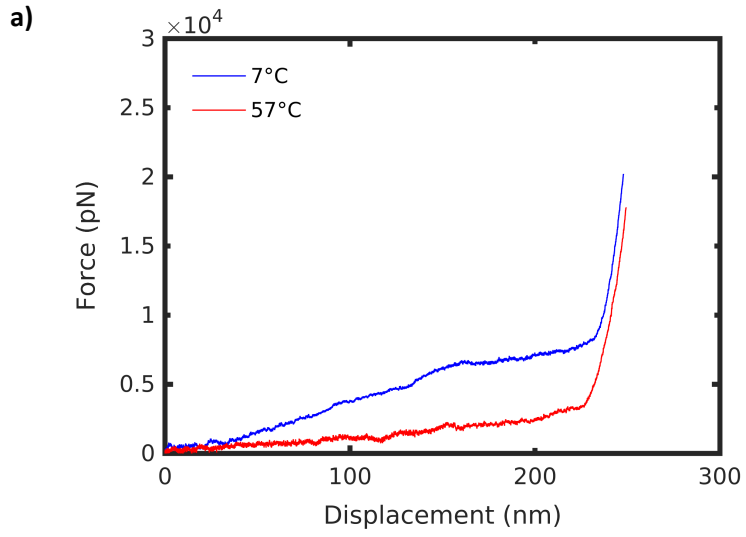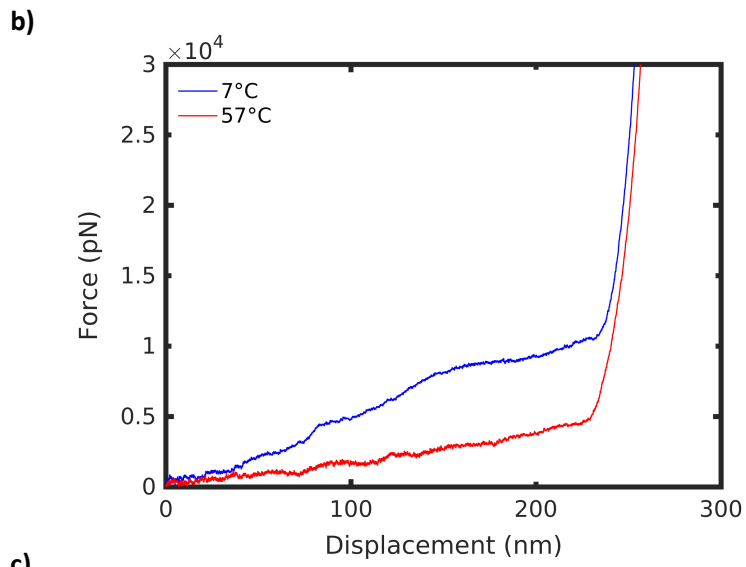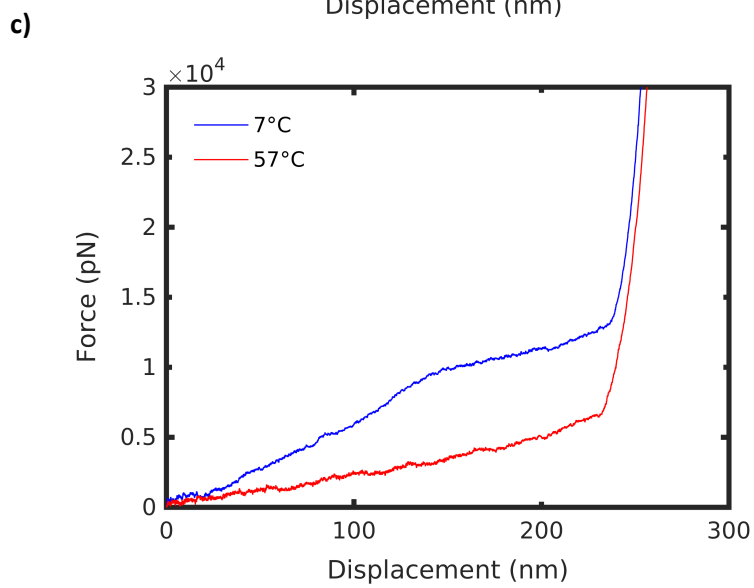

**SI Figure 4** | Force-displacement curves at 7°C and 57°C for pulling speed a) 20 m/s b) 30 m/s and c) 40 m/s.

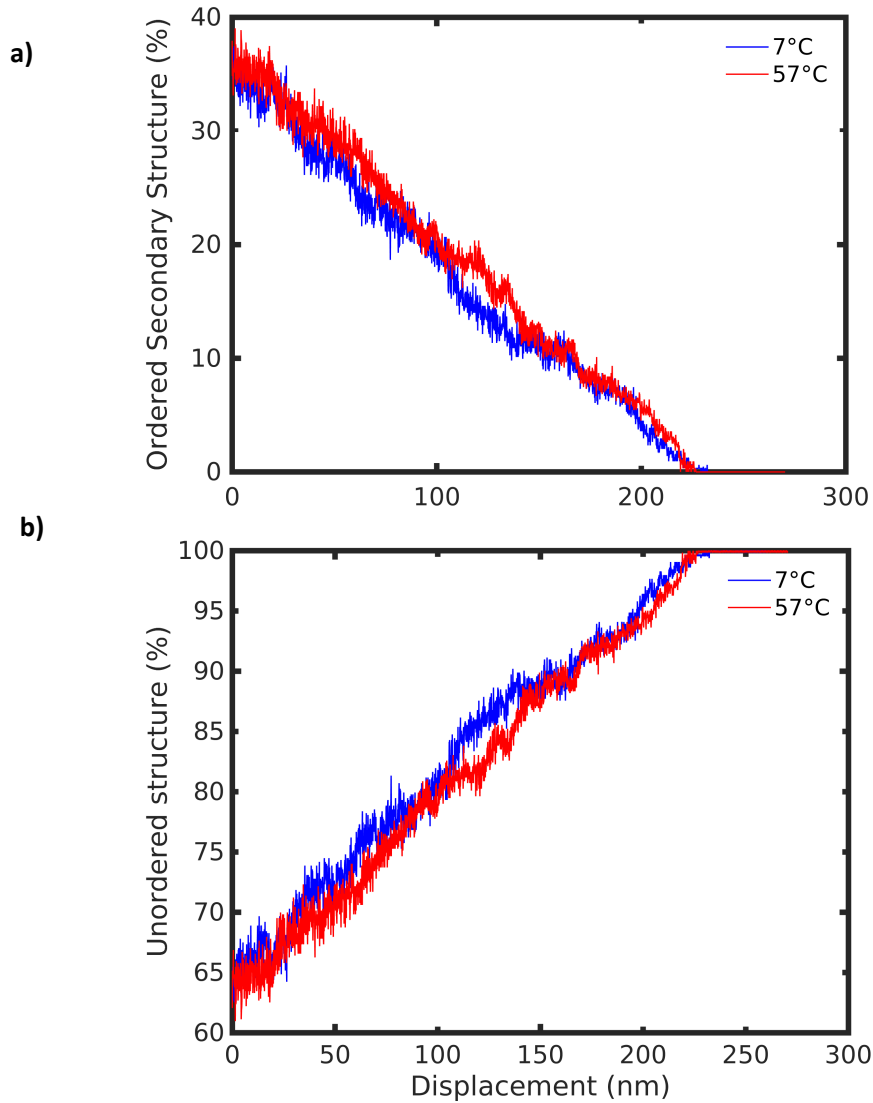

**SI Figure 5** | Evolution of secondary structure at 7°C and 57°C during SMD pulling. Ordered structure includes beta structure and helices. Unordered structure includes bends, turns and coils.
